# Supplementary material for: Outer Membrane Protein F Is Involved in Biofilm Formation, Virulence and Antibiotic Resistance in Cronobacter sakazakii
Source: MDPI journal article supplement (doi:10.3390/microorganisms9112338), 2021-11-11
Supplement: s1 [file s1]

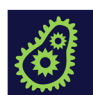

# Supplementary material

**Table S1.** Bacterial strains and plasmids used in this study.

| Strains or plasmids | Genotype and/or characteristics                                                                                                      | Reference or source |
|---------------------|--------------------------------------------------------------------------------------------------------------------------------------|---------------------|
| ATCC BAA-894        | <i>Cronobacter sakazakii</i>                                                                                                         |                     |
| $\Delta ompF$       | WT                                                                                                                                   | ATCC                |
| <i>cpompF</i>       | $\Delta ompF::km^r$                                                                                                                  | This study          |
|                     | $\Delta ompF$ with pACYC184-413                                                                                                      | This study          |
| DH5 $\alpha$        | <i>Escherichia coli</i>                                                                                                              |                     |
|                     | $\gamma\text{-}\Phi 80\Delta lacZ\Delta M15\Delta(lacZYA\text{-}argF)U169\text{ }recA1\text{ }endA1\text{ }hsdR17(rk^-\text{ }mk^-)$ | Kim et al.          |
|                     | <i>supE44 thi-1 gyrA relA1</i>                                                                                                       |                     |
|                     | Plasmids                                                                                                                             |                     |
| pKD46               | <i>oriR101 repA101(Ts) Amp<sup>r</sup> araADpgam-bet-exo</i>                                                                         | Kim et al.          |
| pMDKUD              | pMD18-T                                                                                                                              | This study          |
| pACYC184            | p15A <i>ori</i> Cm <sup>r</sup> Tet <sup>r</sup>                                                                                     | Kim et al.          |
| pACYC413            | pACYC184- <i>ompF</i>                                                                                                                | This study          |

**Table S2.** Primers used in this study.

| Gene amplified | Primers                   | Primer sequences (5' to 3')     | Amplicon size (bp) | Note            |
|----------------|---------------------------|---------------------------------|--------------------|-----------------|
|                |                           | Mutant construction             |                    |                 |
| kana-F         | Km <sup>r</sup> cassette  | CGGATCCGAGGTATGTAGGCGGTGC       | 26                 | <i>Bam</i> HI   |
| kana-R         |                           | CGCGTCGACATATGTATCCGCTCATGAATT  | 30                 | <i>Sal</i> I    |
| ompF5-F        | Upstream of <i>ompF</i>   | GGGGTACCGCGTTGTGCCTGTAGCC       | 25                 | <i>Kpn</i> I    |
| ompF5-R        |                           | CGGGATCCTGTCTGTCTGGCATCTTTCC    | 28                 | <i>Bam</i> HI   |
| ompF3-F        | Downstream of <i>ompF</i> | CGCGTCGACGAAATCACAATGGAACCTCGTC | 31                 | <i>Sal</i> I    |
| ompF3-R        |                           | CCCAAGCTTTCCCGTCTGCTGGTTTCG     | 27                 | <i>Hind</i> III |
|                |                           | Complementation                 |                    |                 |
| Cp413-F        | <i>ompF</i> gene          | CGGGATCCTTCTATTACGGTTTCACGG     | 27                 | <i>Bam</i> HI   |
| Cp413-R        | sequence                  | CGCGTCGACACGAGGTTCCATTGTGATT    | 28                 | <i>Sal</i> I    |

**Table S3.** Raman intensities of different wavenumbers.

| Wave numbers | Raman intensity (a.u.) |                        |                       |
|--------------|------------------------|------------------------|-----------------------|
|              | WT                     | $\Delta ompF$          | <i>cpompF</i>         |
| 852.63       | 49803.93 <sup>a</sup>  | 12332.86 <sup>b</sup>  | 22702.15 <sup>c</sup> |
| 1002.94      | 46893.56 <sup>a</sup>  | 10611.55 <sup>b</sup>  | 21559.08 <sup>c</sup> |
| 1126.76      | 48777.15 <sup>a</sup>  | 11321.138 <sup>b</sup> | 22094.28 <sup>c</sup> |
| 1287.73      | 52595.36 <sup>a</sup>  | 16261.23 <sup>b</sup>  | 28445.75 <sup>c</sup> |
| 1451.74      | 51277.15 <sup>a</sup>  | 13301.40 <sup>b</sup>  | 24290.73 <sup>c</sup> |

<sup>a, b, c</sup> in the same raw with different letters indicate significant difference at the 0.01 level according to one-way ANOVA.
